# Supplementary material
Source: ML conference proceedings conference paper supplement (https://openaccess.thecvf.com/content/ICCV2021/html/Peng_Pi-NAS_Improving_Neural_ICCV_2021_paper.html)
Supplement: Supplementary file 1 [file Peng_Pi-NAS_Improving_Neural_ICCV_2021_supplemental.pdf]

# Pi-NAS: Improving Neural Architecture Search by Reducing Supernet Training Consistency Shift

## Supplementary Material

Jiefeng Peng<sup>1,2,\*</sup>, Jiqi Zhang<sup>1,\*</sup>, Changlin Li<sup>3</sup>, Guangrun Wang<sup>4,†</sup>,  
Xiaodan Liang<sup>1</sup>, Liang Lin<sup>1</sup>

<sup>1</sup>Sun Yat-sen University <sup>2</sup>DarkMatter AI Research

<sup>3</sup>GORSE Lab, Dept. of DSAI, Monash University <sup>4</sup>University of Oxford

{jiefengpeng, wanggrun, xdliang328}@gmail.com,

zhangjq49@mail2.sysu.edu.cn, changlin.li@monash.edu, linliang@ieee.org

## A. Appendix

### A.1. Extensive Experiments on NAS-Bench-201

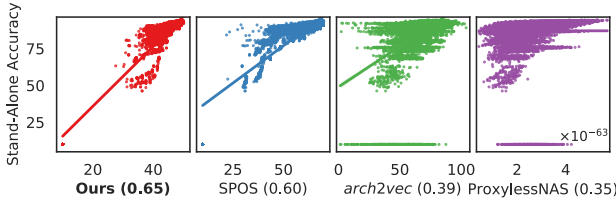

Figure 6: Ranking correlations on all 15625 architectures on NAS-Bench-201 [18] on CIFAR-10 compared to SPOS [20], *arch2vec* [59] and ProxylessNAS [9].

We also validate our Pi-NAS’s ranking correlation on all 15625 architectures on NAS-Bench-201 [18]. As shown in Figure 6, our method still outperforms SPOS [20], *arch2vec* [59] and ProxylessNAS [9]. However, our Pi-NAS’s advantage over SPOS [20] (0.65 vs. 0.60) shrinks compared to the submission’s Figure 3 (NOT Figure 8 in this appendix) (0.70 vs. 0.57).

We assume the ranking correlation degradation might be attributed to *skip connection* operation in the search space. To justify this assumption, we provide some visualization in Figure 7. Specifically, we replace a non-skip-connection operation (*i.e.*, *zero*,  $1 \times 1$  *convolution*,  $3 \times 3$  *convolution* or  $3 \times 3$  *average pooling*) with a *skip connection* for all architectures in the search space. Then, we compare the estimated accuracy change vs. actual accuracy change before and after such a replacement. When an architecture’s estimated accuracy change is smaller than 0.01, we plot its

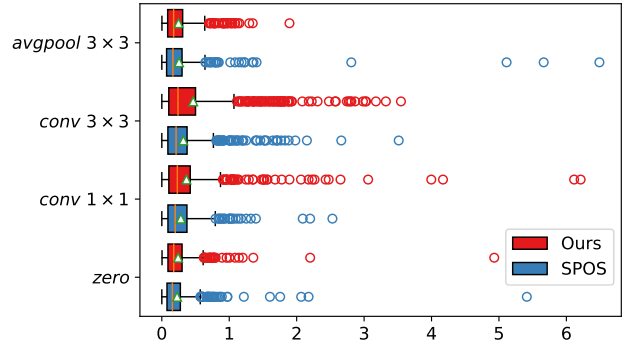

Figure 7: The actual accuracy change (absolute value) of architecture satisfying that the estimated accuracy change is smaller than 0.01 after replacing one operation (*zero*,  $1 \times 1$  *convolution*,  $3 \times 3$  *convolution* or  $3 \times 3$  *average pooling*) with *skip connection* for Pi-NAS and SPOS [20], respectively.

actual accuracy change (absolute value) in Figure 7 for Pi-NAS and SPOS, respectively. As shown, there is a significant gap between the estimated accuracy change and actual accuracy change before and after a *skip connection* replacement (*i.e.*, **before:**  $< 0.01$ ; **after:** usually  $> 1$ ). This visualization indicates *skip connection* operation does hurt ranking correlation for both Pi-NAS and SPOS, verifying our assumption.

Previous works have also observed this ranking correlation degradation. As pointed out in [15, 30], *skip connection* can increase supernet scalability in the depth dimension, but it can lead to convergence difficulty of the supernet and unfair comparison of subnets. In addition, our cross-path learning is more prone to this problem since we directly reduce the feature consistency shift between different paths whether with *skip connection* operation or not without special treatment, which can cause the overestimated performances of the architectures containing *skip connection*.

\*Jiefeng Peng and Jiqi Zhang are co-first authors and share equal contributions. Their names are listed in alphabetical order.

†Corresponding Author.

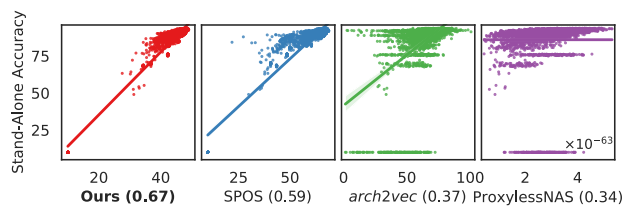

Figure 8: Ranking correlations on 4096 architectures on NAS-Bench-201 [18] on CIFAR-10 without *skip connection* operation compared to SPOS [20], *arch2vec* [59] and ProxylessNAS [9].

As Figure 8 shows, after leaving out the architectures with *skip connection* operation,  $\Pi$ -NAS’s advantage recovers. For future work, we will try to develop the scalability of  $\Pi$ -NAS to solve such limitation.

**There is one more page showing our searched architectures. Don’t hesitate to scroll your mouse.**

## A.2. Model Architectures

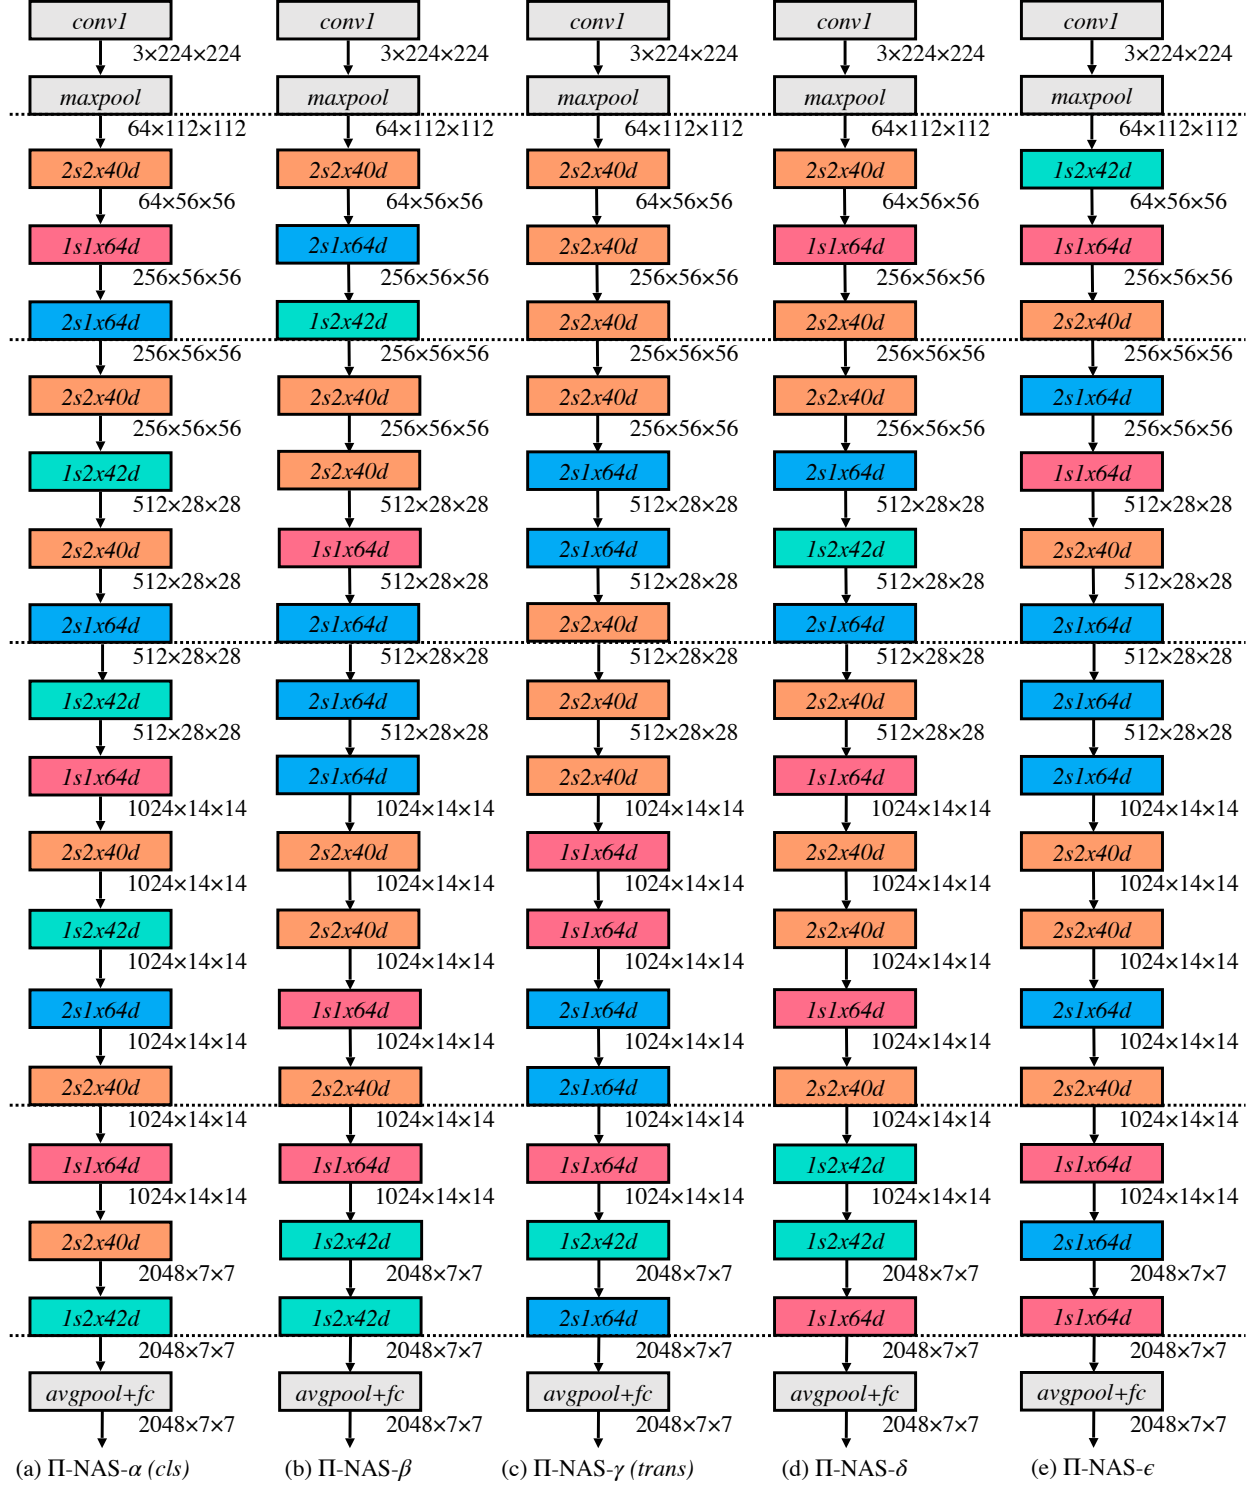

Figure 9: Architectures of II-NAS- $\alpha$  (i.e., II-NAS-cls), II-NAS- $\beta$ , II-NAS- $\gamma$  (i.e., II-NAS-trans), II-NAS- $\delta$  and II-NAS- $\epsilon$ . They are combinations of *Split-Attention* block with radix  $s$ , cardinality  $x$  and width  $d$ .
